# Supplementary material for: The Cannabinoid Content of Legal Cannabis in Washington State Varies Systematically Across Testing Facilities and Popular Consumer Products
Source: Springer Nature journal article supplement (doi:10.1038/s41598-018-22755-2), 2018-03-08

# The Cannabinoid Content of Legal Cannabis in Washington State Varies Systematically Across Testing Facilities and Popular Consumer Products

Nick Jikomes<sup>1\*</sup> & Michael Zoorob<sup>2\*</sup>

<sup>1</sup>Leafly Holdings, Inc., Division of Data Science, Seattle, WA 98104, USA. <sup>2</sup>Harvard University, Department of Government, Cambridge, MA 02138, USA. \*These authors contributed equally to this work. Correspondence and requests for materials should be addressed to N.J. (email: [njikomes@gmail.com](mailto:njikomes@gmail.com))

## Supplemental Figure Legends

### **Figure S1: THC:CBD Distributions of Flower Products Vary Widely Across Labs.**

Histograms showing the distribution of THC:CBD for flower products measured by six I-502 certified laboratories between 2014-2017. (a) Lab A (n=62,719); (b) Lab B (n=17,786); (c) Lab C (n=31,945); (d) Lab D (n=22,234); (e) Lab E (n=13,788); (f) Lab F (n=26,664).

### **Figure S2: THC:CBD Distributions of Concentrate Products Vary Widely Across Labs.**

Histograms showing the distribution of THC:CBD for concentrates measured by the six Washington state laboratories between 2014-2017. (a) Lab A (n=6,871); (b) Lab B (n=7,128); (c) Lab C (n=2,793); (d) Lab D (n=8,727); (e) Lab E (n=1,126); (f) Lab F (n=3,152).

### **Figure S3: Mean THC Levels for Chemotype I Concentrates Over Time.**

(a) Total THC levels over time averaged across all labs (n=6) vs low THC reporting (LTR) and high THC reporting (HTR) labs (n=3 each). (b) Distribution of THC levels for each year on record for the three labs reporting the lowest mean THC levels. (c) Effect size matrix quantifying the mean difference in THC levels across years for low-THC labs. (d) Distribution of THC levels for each year for the three labs reporting the highest mean THC levels, and (e) the effect size matrix quantifying the magnitude of yearly differences.

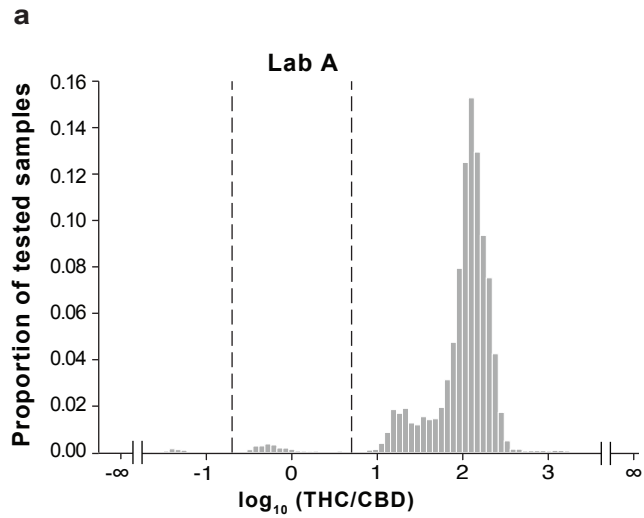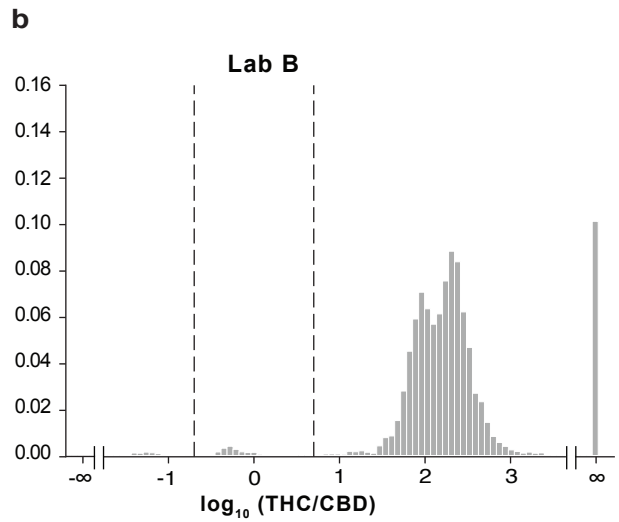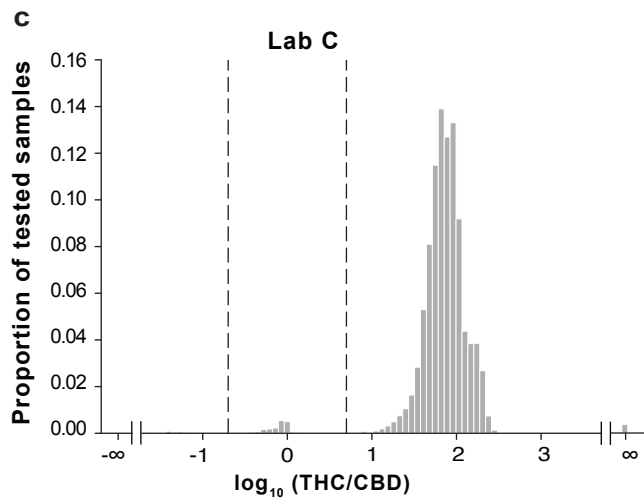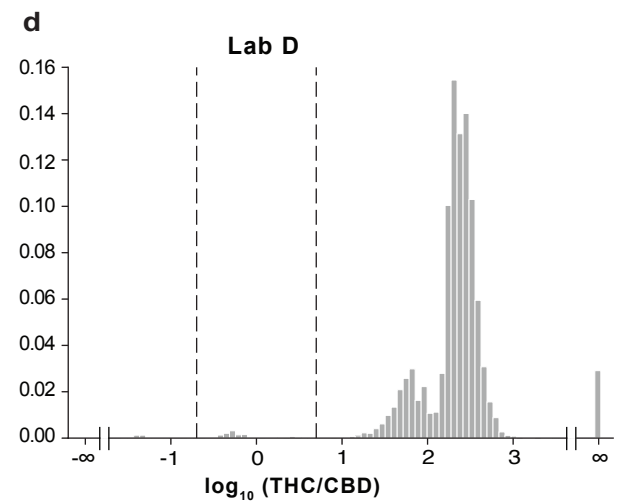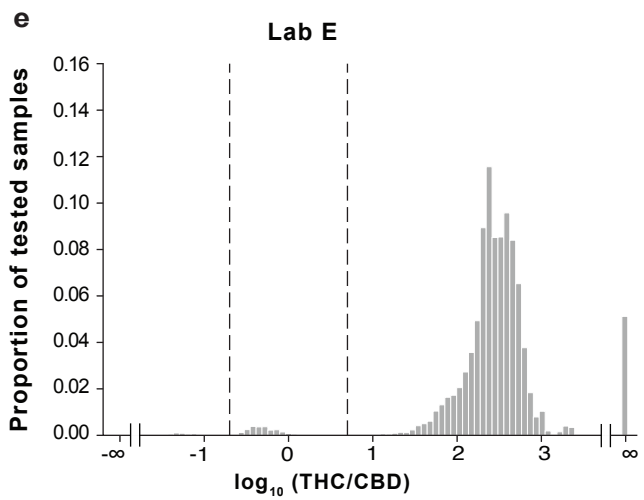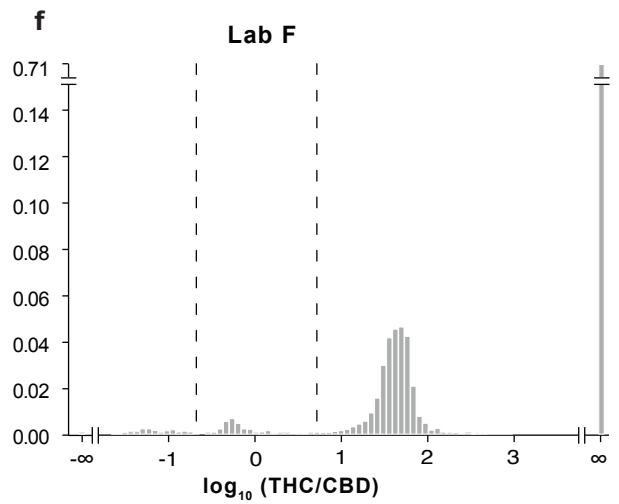

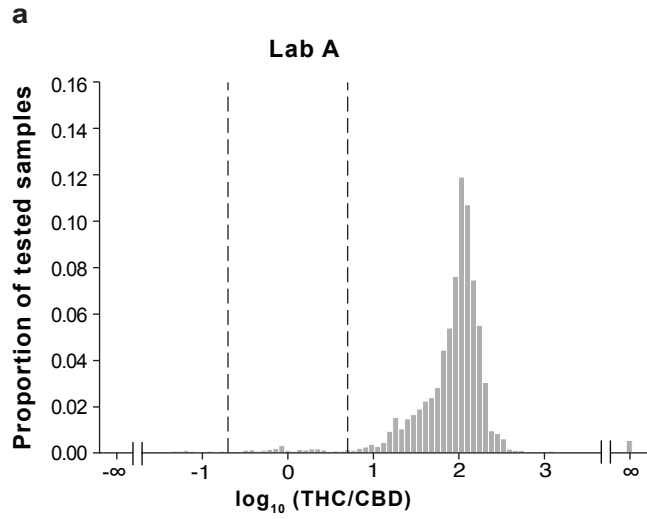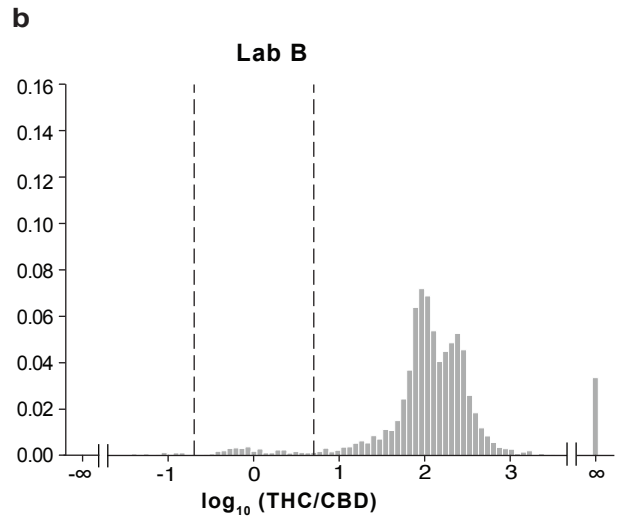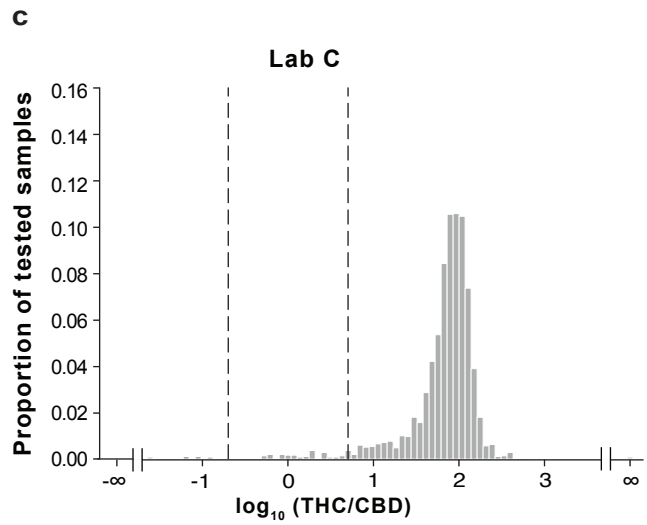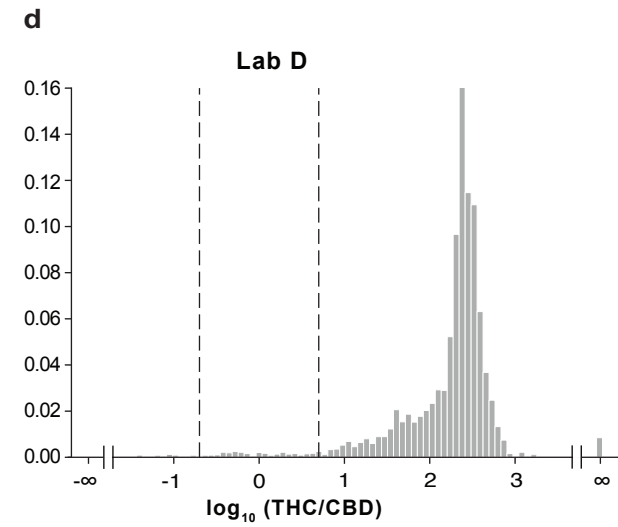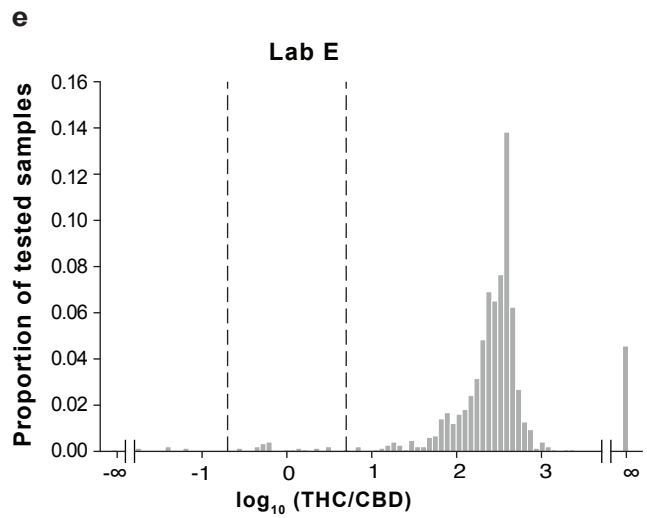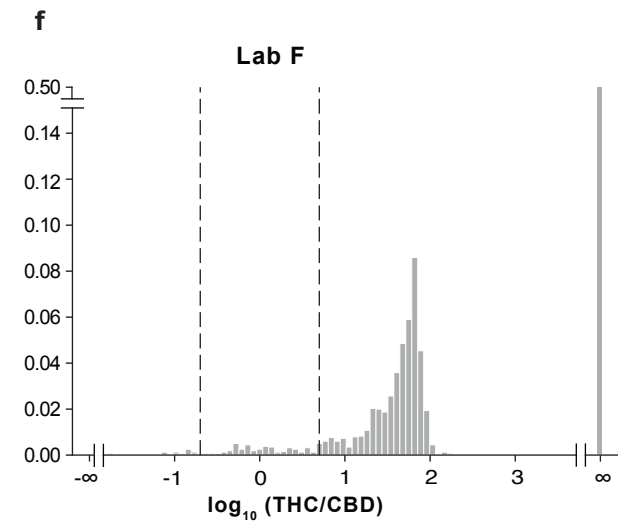

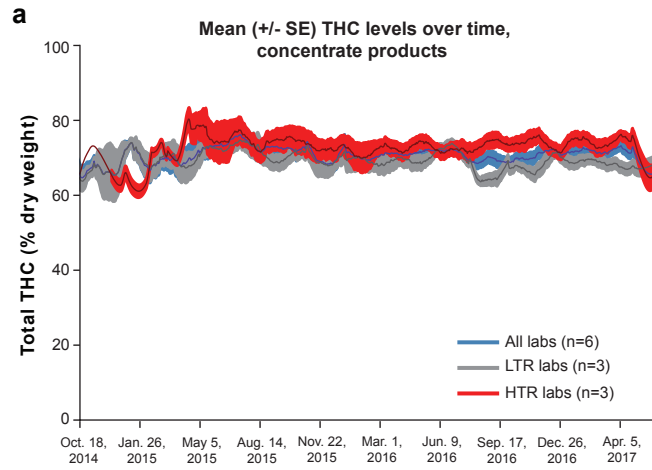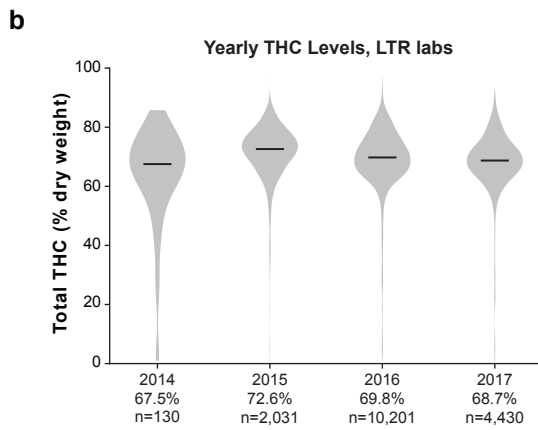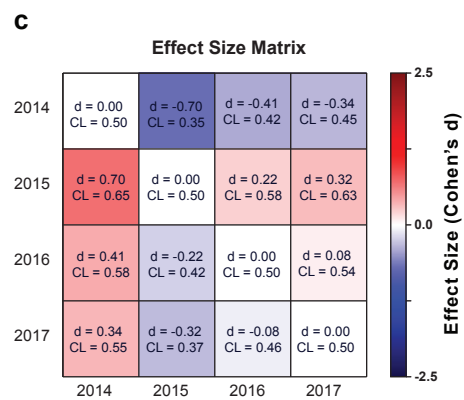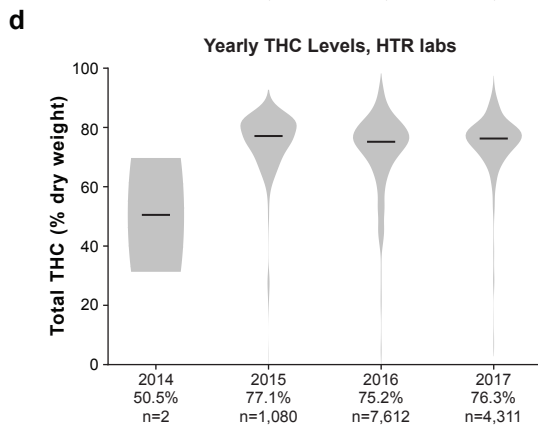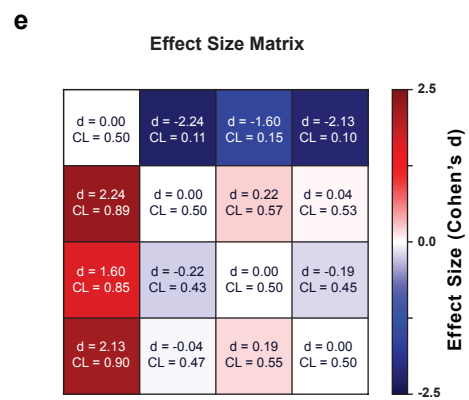

Supplement: MOESM1 [file 41598_2018_22755_MOESM1_ESM.pdf]
